# Supplementary material for: Voltage modulates the effect of μ‐receptor activation in a ligand‐dependent manner
Source: PubMed Central journal article supplement (PMC7348086; doi:10.1111/bph.15070), 2020-05-19
Supplement: BPH-177-3489-s001.pdf [file BPH-177-3489-s001.pdf]

# Supplementary Material:

## **Opioid analgesics activate $\mu$ -opioid receptors in a voltage dependent manner**

Julia G. Ruland<sup>1</sup>, Sina B. Kirchhofer<sup>1</sup>, Sebastian Klindert<sup>1,2</sup>, Chris P. Bailey<sup>2</sup> & Moritz Bünemann<sup>1\*</sup>

<sup>1</sup> Department of Pharmacology and Clinical Pharmacy, Philipps-University D-35043 Marburg, Germany.

<sup>2</sup> Department of Pharmacy and Pharmacology, University of Bath, Bath BA2 7AY, United Kingdom.

\*To whom correspondence should be addressed: Email: moritz.buenemann@staff.uni-marburg.de.

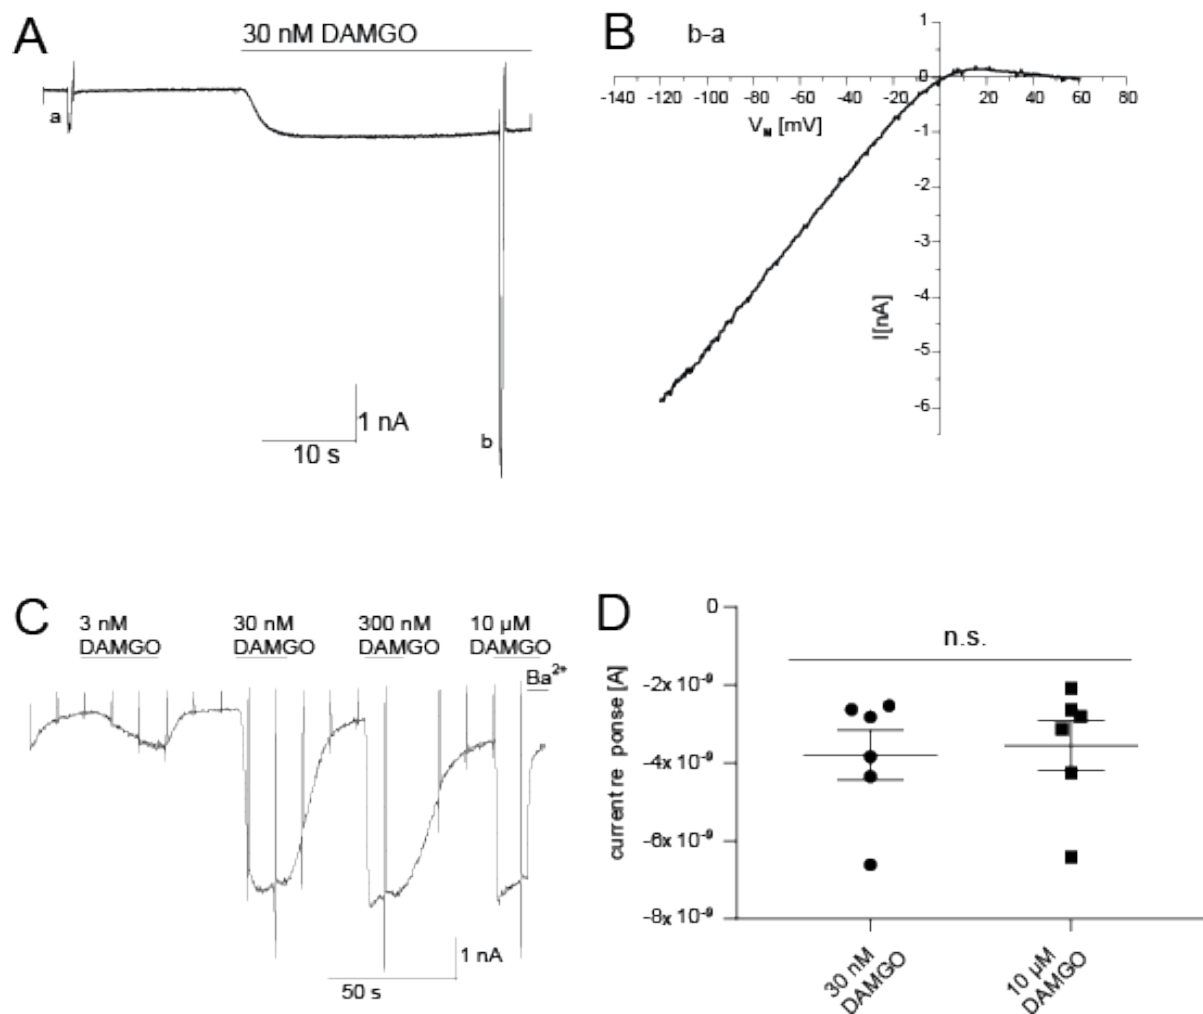

**Figure S1: Membrane potential regulates MOP-induced outward GIRK currents.** *A*, Magnification of the excerpt, which was used for calculation of the background subtracted I/V curve (shown in *B*). Voltage ramps which were used for calculation are marked as *a* and *b*. *B*, Background subtracted I/V-curve (*b-a*, obtained from the voltage ramps *a* and *b*), as indicated in *fig. S1A* show strong inward rectification. *C*, Representative recording ( $n = 6$ ) of GIRK current responses to increasing concentrations of DAMGO. *D*, Statistical comparison of GIRK current responses to 30 nM and 10 μM DAMGO. As responses were compared within the same cell statistics were performed using a paired t-test (n.s.:  $p > 0.05$ ,  $n = 6$ ).

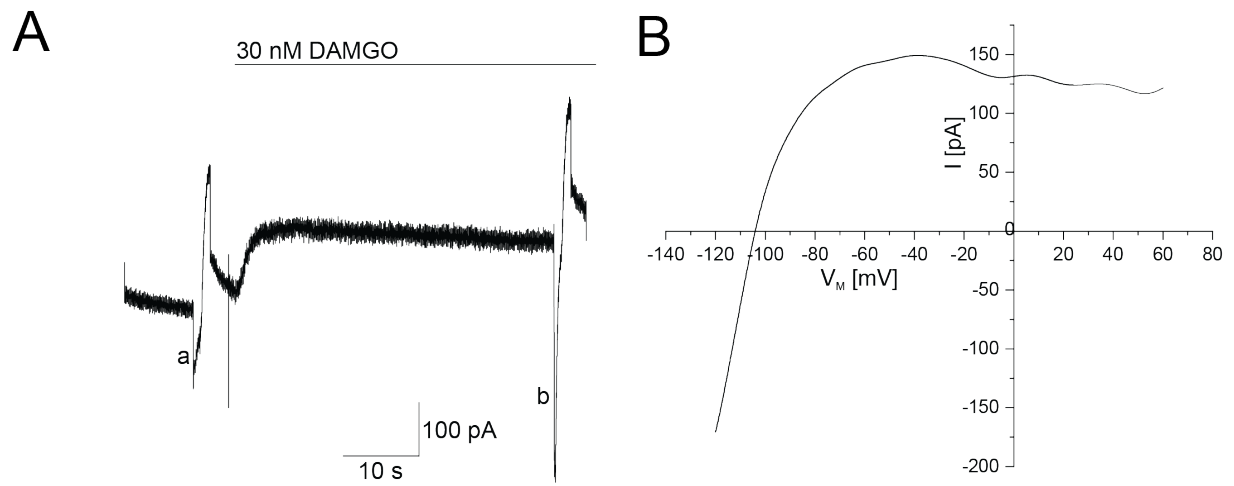

**Fig. S2: The observed voltage sensitivity occurs also in physiological  $K^+$  concentrations. *A*, Magnification of the excerpt, which was used for calculation of the background subtracted I/V-curve (shown in *B*). Voltage ramps which were used for calculation are marked as a and b. *B*, Background subtracted I/V-curve (b-a, obtained from the voltage ramps a and b), as indicated in *fig. S2A*.**

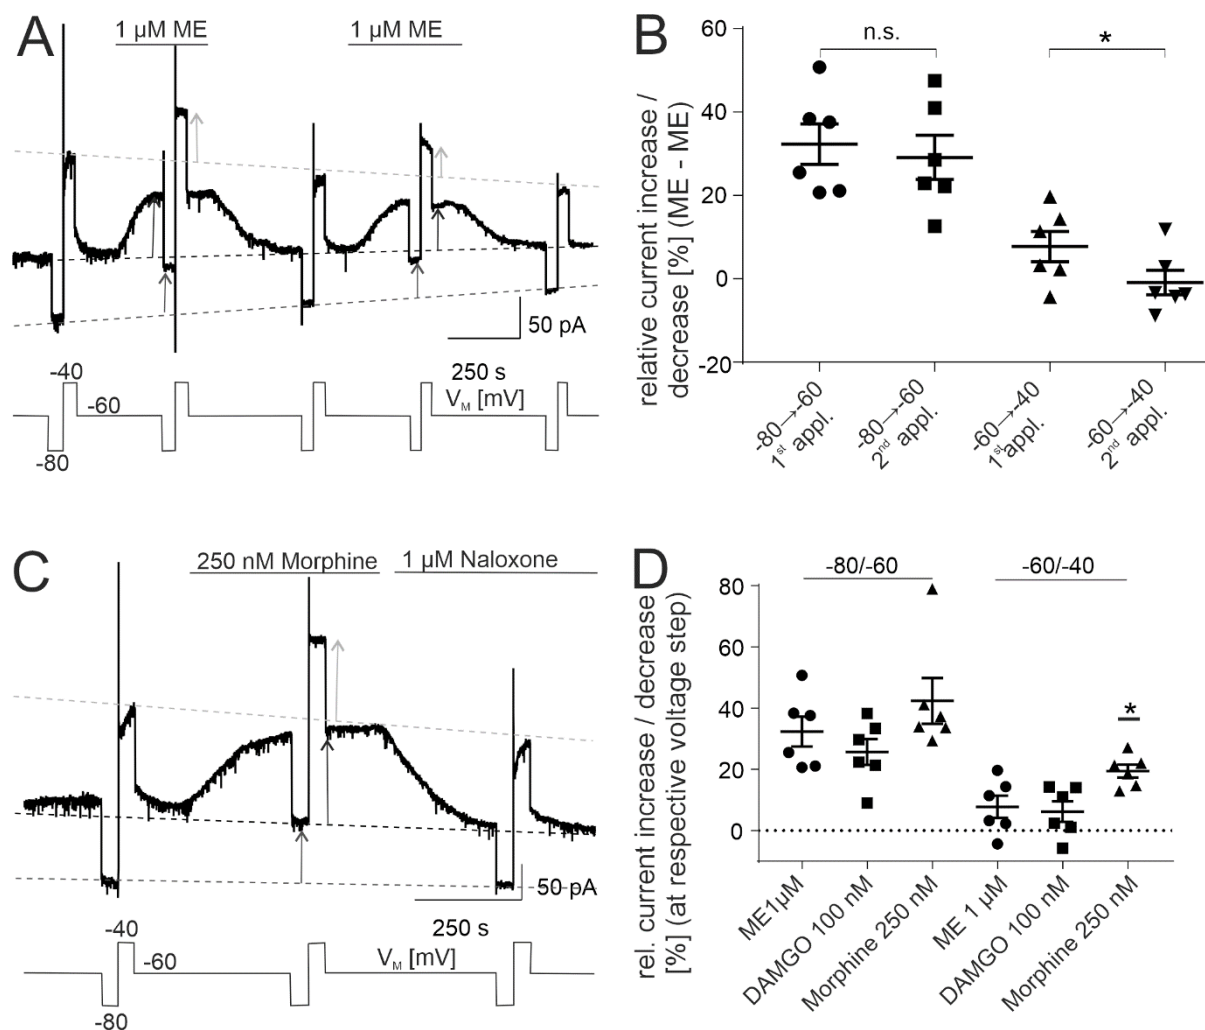

**Figure S3: Comparison of voltage induced current responses in LC neurons.** *A*, Representative recording of outward  $K^+$  currents in LC neurons. GIRK currents were evoked by non-saturating concentration of Met-enkephalin (ME;  $1 \mu\text{M}$ ). During measurements, cells were kept at  $-60 \text{ mV}$  and briefly clamped to  $-80 \text{ mV}$  and  $-40 \text{ mV}$  in turn (voltage protocol is depicted at the bottom, note that depolarization steps shift both basal and active currents due to the current-voltage relationship of the channel). Baseline current responses at each membrane potential (dashed lines) were determined by voltage-steps in control aCSF. The magnitude of respective agonist induced current responses are depicted as arrows (dark grey:  $-80 \text{ mV}$ ; black:  $-60 \text{ mV}$ , light grey:  $-40 \text{ mV}$ ). *B*, Statistical analysis in voltage induced current change for 2 subsequent applications of Met-enkephalin (ME) shows that second applications of ME cause significantly smaller current responses ( $*p < 0.05$ ;  $n = 6$ ; paired t-test). *C*, Representative recording of morphine ( $250 \text{ nM}$ ) induced responses upon single ligand application in LC neurons. During measurements, cells were kept at  $-60 \text{ mV}$  and briefly clamped to  $-80 \text{ mV}$  and  $-40 \text{ mV}$  in turn (voltage protocol is depicted at the bottom, note that depolarization steps shift both basal and active currents due to the current-voltage relationship of the channel). Baseline current responses at each membrane potential (dashed lines) were determined by voltage-steps in control aCSF. To accelerate wash out of morphine, naloxone ( $1 \mu\text{M}$ ) was applied afterwards. The magnitude of respective agonist induced current response is depicted as arrows (dark grey:  $-80 \text{ mV}$ ; black:  $-60 \text{ mV}$ , light grey:  $-40 \text{ mV}$ ). *D* Voltage-induced current changes during single agonist applications of Met-enkephalin (ME), DAMGO or morphine (as shown in fig. S3C,  $*: p < 0.05$ , ordinary one-way ANOVA with Tukey's multiple comparison test;  $n = 6$  respectively) show that relative increase of currents in the  $-60$  to  $-40$  depolarization step are significantly higher during morphine application. Note, that due to the current voltage relationship a general increase in ligand-evoked currents can be seen upon depolarization, from which the increase seen upon morphine application differs statistically significantly.

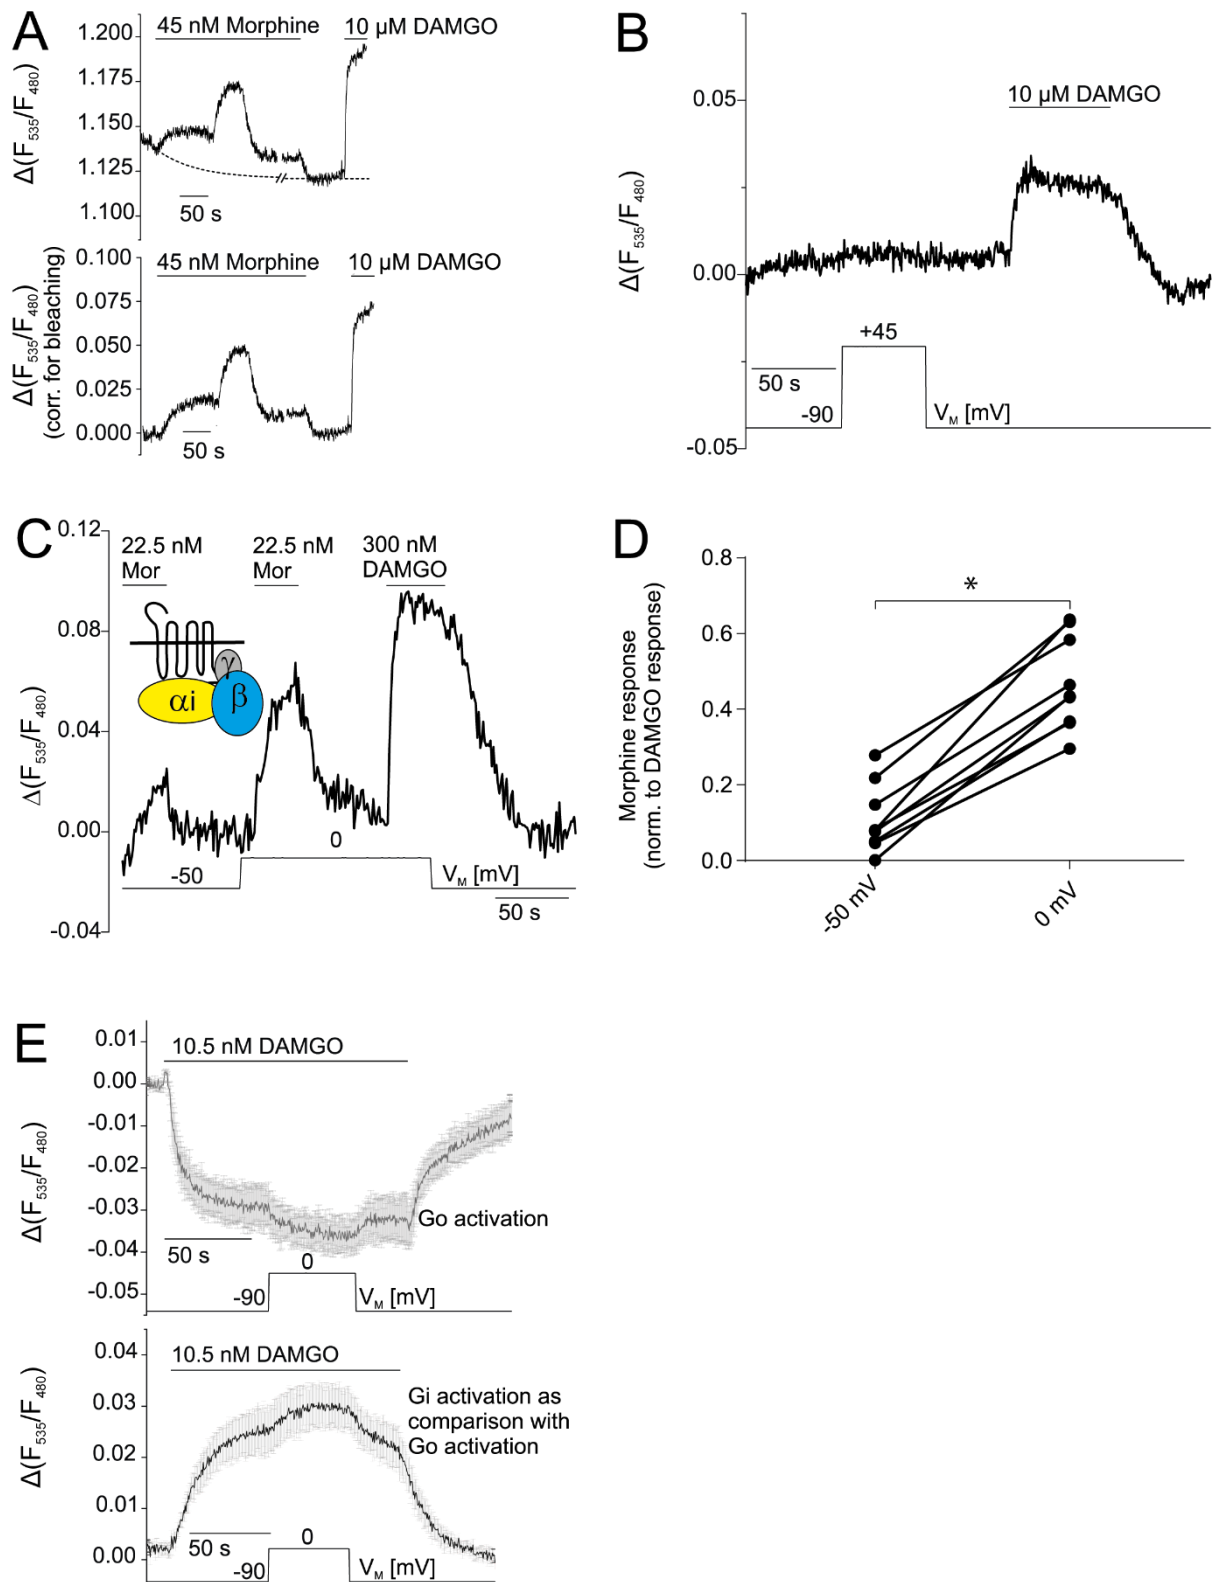

**Figure S4: Bleach correction of FRET recordings, depolarization in the absence of agonist, Reproduction of the protocol from GIRK recordings in FRET recordings from G-protein activation, comparison of voltage induced changes in Go- and Gi-protein activation assay, A, Representative FRET trace of a cell that was transiently transfected with unlabeled MOP,  $G\alpha_i$ -YFP,  $G\beta_1$ -mTur2 and  $G\gamma$  without correction for photobleaching (above) and after subtraction with a mono-exponential function (below). B, Representative cell (out of  $n = 5$ ) that was transfected with unlabeled**

MOP, G $\alpha_i$ -YFP, G $\beta_1$ -mTur2 and G $\gamma$ . A depolarization step from a holding potential of -90 mV to +45 mV was performed upon buffer application and for control reasons, a saturating concentration of agonist (McPherson et al., 2010) was applied subsequently. **C**, A representative FRET recording (out of n=9) from cells that were transfected with MOP-wt, G $\alpha_i$ -YFP, G $\beta_1$ -mTur2, G $\gamma_2$ -wt is illustrated. Morphine- or DAMGO-mediated G-protein activation is shown by an increase in FRET (Bünemann et al., 2003) measured at -50 mV and 0 mV. Traces were corrected for photobleaching as indicated in *fig. S3A*. **D**, In analogy to GIRK current measurements (as conducted in Fig. 2), the same protocol was used to determine G-protein activation evoked by a non-saturating morphine concentration (22.5 nM) was normalized to the maximum response (300 nM DAMGO) at respective membrane potentials (n=9) and the relative voltage-dependent effect induced by morphine was compared at -50 mV and 0 mV (\* $p < 0.05$  between responses at -50mV and 0mV; paired t-test, as responses were compared within the same cell). **E**, Averaged (mean  $\pm$  S.E.M., n = 9 for Gi, n = 3 for Go) preliminary traces of agonist/voltage evoked alterations in FRET are shown and compared for cells expressing the Go-FRET sensor (upper panel) or the Gi-protein-FRET sensor (Bünemann et al., 2003; Frank et al., 2005). **F**,

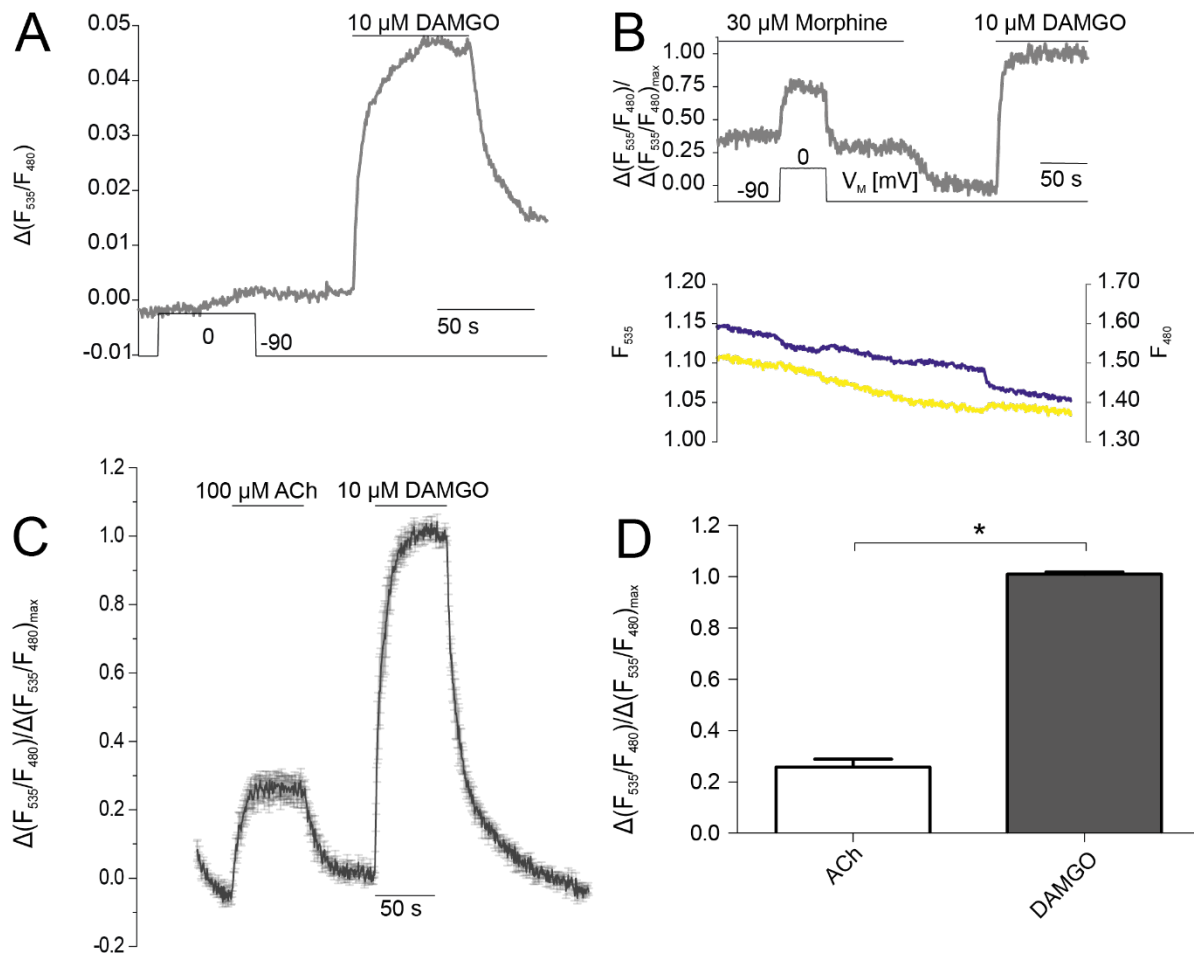

**Figure S5: Depolarization in the absence of agonist, single emission traces and Bystander FRET experiments in a GRK2-recruitment assay.** **A**, Representative FRET (out of  $n = 6$ ) recording from cells that were transfected with sYFP2-labelled MOP and mTur2-labelled GRK2, as shown previously. Depolarization in the absence of agonist has no effect on MOP – GRK2 interactions. **B**, Representative FRET recording plotted as relative agonist evoked alterations in the sYFP2/mTur2 emission ratio and corresponding recordings of CFP ( $F_{480}$ ) and YFP ( $F_{535}$ ) emission. **C**, Bystander FRET between MOP-sYFP2 and GRK2-mTur2 evoked by 100  $\mu$ M ACh at non-labelled muscarinic  $M_3R$  leads to 26 %  $\pm$  3 % (mean  $\pm$  S.E.M.) non-specific FRET (compared to a maximum DAMGO response ( $n = 9$ )), **D**, Statistical analysis of FRET amplitudes following non-specific, ACh-evoked response and DAMGO-induced response. To compare responses within the same cell, a paired t-test was used (\*:  $p < 0.05$ ).

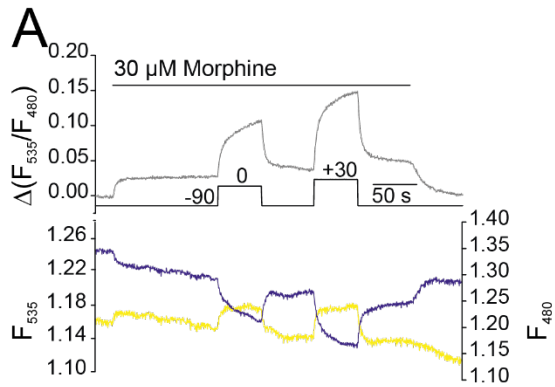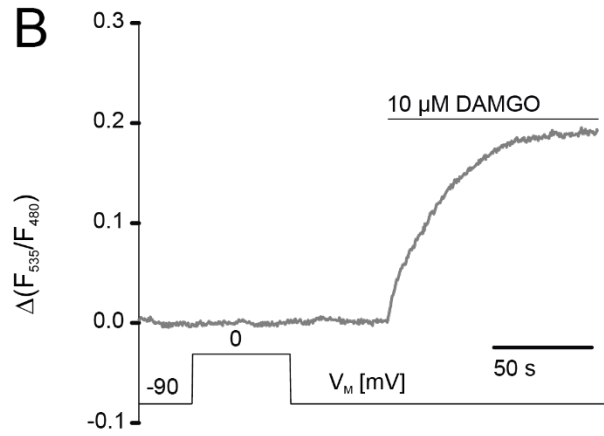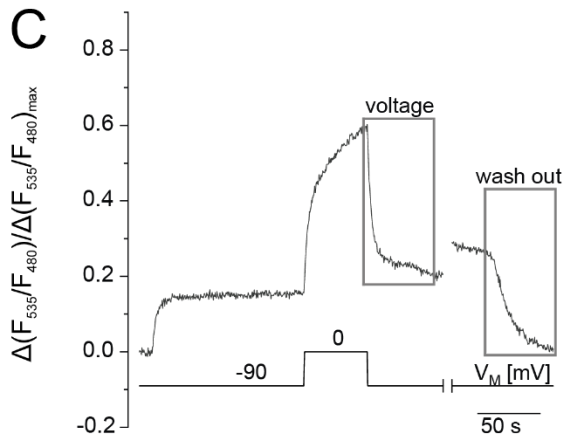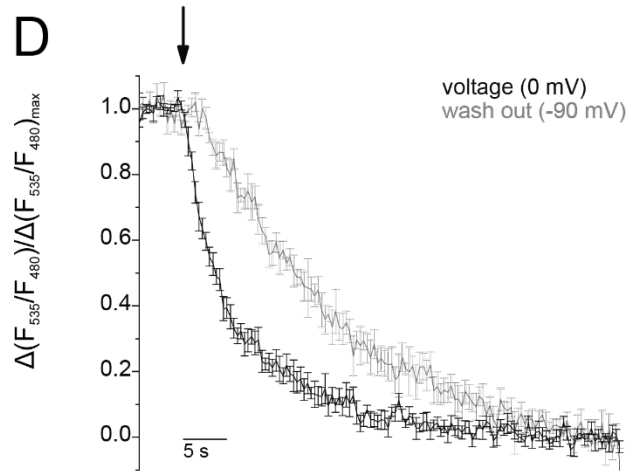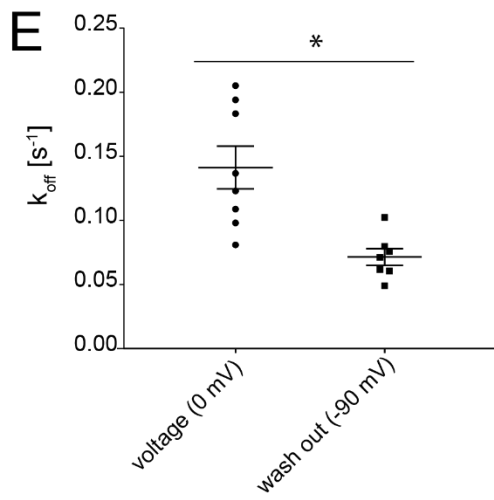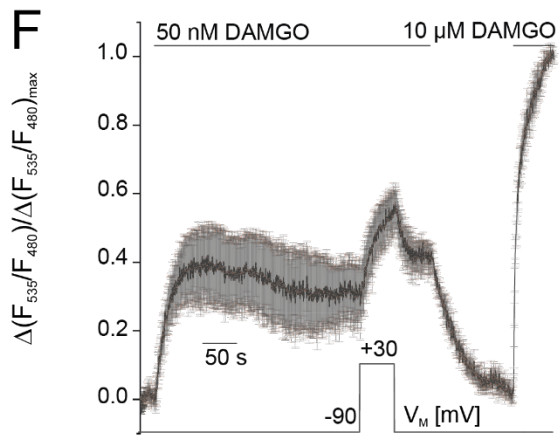



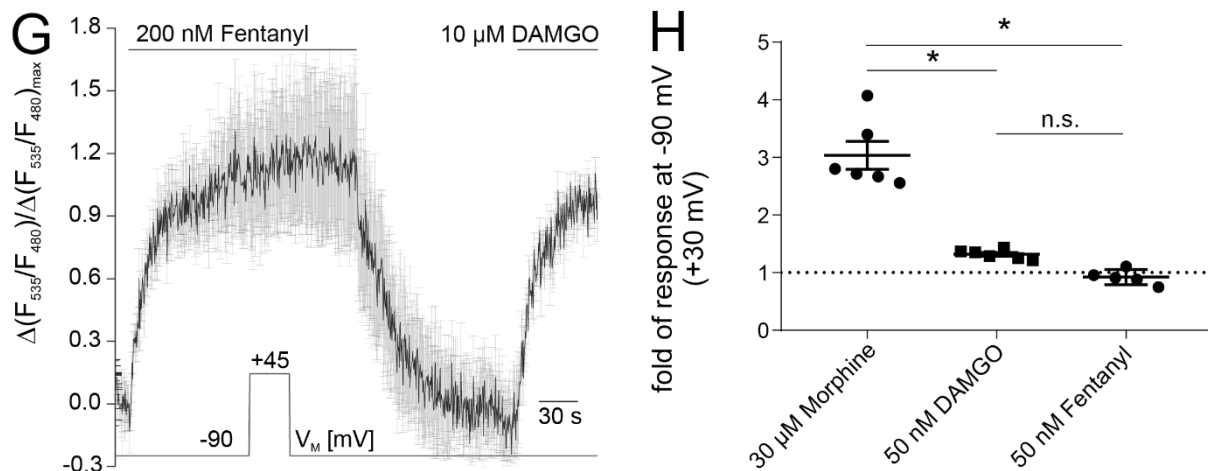

**Figure S6: Single emission traces and depolarization in the absence of agonists, kinetics of voltage-induced changes, characterization of voltage induced effects on DAMGO- or fentanyl-mediated Arrestin3 recruitment at equieffective concentrations to morphine.** *A*, Representative FRET recording plotted as relative agonist evoked alterations in the sYFP2/mTur2 emission ratio and corresponding recordings of CFP ( $F_{480}$ ) and YFP ( $F_{535}$ ) emission. *B*, Voltage does not influence MOP – Arrestin3 interactions in the absence of agonist (representative FRET trace,  $n = 7$ ). *C*, Exemplary trace (of  $n = 7$ ) indicates which excerpts were used for determination of kinetic analysis (see fig. S6D, E) of depolarization-induced or wash-out induced termination of MOP-Arrestin interaction. *D*, Average (mean  $\pm$  S.E.M.) recordings showing termination of the MOP-Arrestin3-interaction upon wash-out (light grey trace,  $n = 7$ ) of 30  $\mu$ M morphine at holding potential (-90 mV) or following repolarization (black trace,  $n = 8$ ) from 0 mV to holding potential (-90 mV) in continued application of 30  $\mu$ M morphine. The arrow indicates the time point of agonist withdrawal or repolarization respectively. *E*, Comparison and statistical analysis of  $k_{off}$ -values (for data see C). Statistical significance was determined by a paired t-test as responses were compared within same cells (\*:  $p < 0.05$ ;  $n = 7$ ). *F*, Average (mean  $\pm$  S.E.M.;  $n = 6$ ) of MOP-Arrestin interaction upon application of 50 nM DAMGO (sub-saturating concentration). Cells were depolarized from -90 mV to +30 mV. *G*, Average (mean  $\pm$  S.E.M.;  $n = 4$ ) of MOP-Arrestin interaction upon application of 200 nM fentanyl, saturating concentration. Cells were depolarized from -90 mV to +45 mV. *H*, Statistical analysis of changes in MOP-Arrestin3 interaction upon depolarization from -90 mV to +30 mV under application of a saturating concentration morphine or a non-saturating concentration of DAMGO or fentanyl (Data shown in Fig. 6E). To confirm statistically significant differences in voltage dependent response for morphine, DAMGO and fentanyl an ordinary one-way ANOVA with Tukey's multiple comparison test was used (\*:  $p < 0.05$ ; n.s.:  $p > 0.05$ ;  $n = 5 - 6$ ).
